# Supplementary material
Source: PubMed Central journal article supplement (PMC5544392)
Supplement: mmc1.pdf [file mmc1.pdf]

## Supplemental Data

### Low-Frequency Synonymous Coding Variation in *CYP2R1* Has Large Effects on Vitamin D Levels and Risk of Multiple Sclerosis

Despoina Manousaki, Tom Dudding, Simon Haworth, Yi-Hsiang Hsu, Ching-Ti Liu, Carolina Medina-Gómez, Trudy Voortman, Nathalie van der Velde, Håkan Melhus, Cassianne Robinson-Cohen, Diana L. Cousminer, Maria Nethander, Liesbeth Vandenput, Raymond Noordam, Vincenzo Forgetta, Celia M.T. Greenwood, Mary L. Biggs, Bruce M. Psaty, Jerome I. Rotter, Babette S. Zemel, Jonathan A. Mitchell, Bruce Taylor, Mattias Lorentzon, Magnus Karlsson, Vincent V.W. Jaddoe, Henning Tiemeier, Natalia Campos-Obando, Oscar H. Franco, Andre G. Utterlinden, Linda Broer, Natasja M. van Schoor, Annelies C. Ham, M. Arfan Ikram, David Karasik, Renée de Mutsert, Frits R. Rosendaal, Martin den Heijer, Thomas J. Wang, Lars Lind, Eric S. Orwoll, Dennis O. Mook-Kanamori, Karl Michaëlsson, Bryan Kestenbaum, Claes Ohlsson, Dan Mellström, Lisette C.P.G.M. de Groot, Struan F.A. Grant, Douglas P. Kiel, M. Carola Zillikens, Fernando Rivadeneira, Stephen Sawcer, Nicholas J. Timpson, and J. Brent Richards

**Figure S1: Comparison of 25OHD levels in heterozygote carriers (AG) and non-carriers (GG) of the rs117913124 variant in the TUK WGS. 25OHD levels are adjusted for age, sex, BMI and season of measurement. 25OHD levels are expressed in nmol/L.**

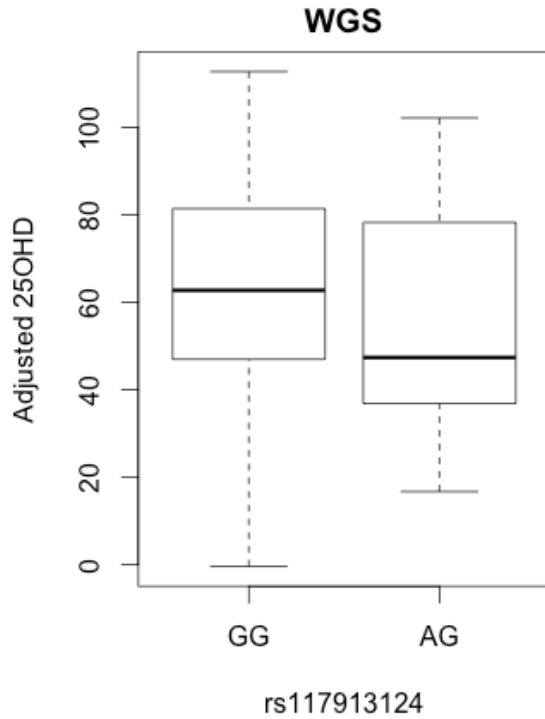

**Figure S2: Interaction analysis forest-plots:** A: estimates for interaction between the rs117913124 and vitamin D intake (continuous) B: estimates for interaction between the rs117913124 and vitamin D intake (tertiles)

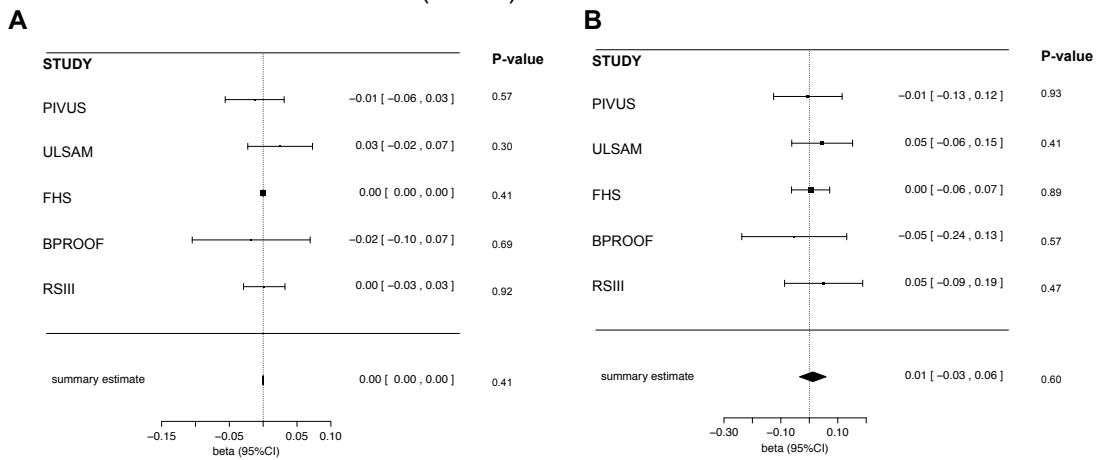

## ***Supplemental Acknowledgments***

ALSPAC: We are extremely grateful to all the families who took part in this study, the midwives for their help in recruiting them, and the whole ALSPAC team, which includes interviewers, computer and laboratory technicians, clerical workers, research scientists, volunteers, managers, receptionists and nurses. The UK Medical Research Council and Wellcome (Grant ref: 102215/2/13/2) and the University of Bristol provide core support for ALSPAC.

BMDCS: We appreciate the dedication of the study participants and their families, and the support of Dr. Karen Winer, Scientific Director of the Bone Mineral Density in Childhood Study.

BPROOF: We thank the participants of the B-PROOF study for their enthusiasm and cooperation. Furthermore, we thank the dedicated research team that is conducting the study. This study is supported and funded by The Netherlands Organization for Health Research and Development (ZonMw, Grant 6130.0031), the Hague; unrestricted grant from NZO (Dutch Dairy Association), Zoetermeer; Orthica, Almere; NCHA (Netherlands Consortium Healthy Ageing) Leiden/Rotterdam; Ministry of Economic Affairs, Agriculture and Innovation (project KB-15-004-003), the Hague; Wageningen University, Wageningen; VUmc, Amsterdam; Erasmus Medical Center, Rotterdam; Unilever, Colworth, UK. All organisations, except Unilever, are based in the Netherlands. The sponsors have no role in the design or implementation of the study, data collection, data management, data analysis, data interpretation, or in the preparation, review, or approval of the manuscript.

GenerationR: We gratefully acknowledge the contribution of children and parents, general practitioners, hospitals, midwives and pharmacies in Rotterdam. The generation and management of GWAS genotype data for the Generation R Study was done at the Genetic Laboratory of the Department of Internal Medicine, Erasmus MC, The Netherlands. We thank Pascal Arp, Mila Jhamai, Marijn Verkerk, Lizbeth Herrera and Marjolein Peters for their help in creating, managing and QC of the GWAS database. The musculoskeletal research of the Generation R study is partly supported by the European Commission grant HEALTH-F2-2008-201865-GEFOS. The general design of Generation R Study is made possible by financial support from the Erasmus Medical Center, Rotterdam, the Erasmus University Rotterdam, the Netherlands Organization for Health Research and Development (ZonMw), the Netherlands Organisation for Scientific Research (NWO), the Ministry of Health, Welfare and Sport. Additionally the Netherlands Organization for Health Research and Development supported authors of this manuscript (ZonMw 907.00303, ZonMw 916.10159, ZonMw VID1 016.136.361 to V.W.V.J., and ZonMw VID1 016.136.367 to F.R.).

RSI, RSII, RSIII: The generation and management of GWAS genotype data for the Rotterdam Study (RS I, RS II, RS III) was executed by the Human Genotyping Facility of the Genetic Laboratory of the Department of Internal Medicine, Erasmus MC, Rotterdam, The Netherlands. The GWAS datasets are supported by the Netherlands Organisation of Scientific Research NWO Investments (nr. 175.010.2005.011, 911-03-012), the Genetic Laboratory of the Department of Internal Medicine, Erasmus MC, the Research Institute for Diseases in the Elderly (014-93-015; RIDE2), the Netherlands Genomics Initiative (NGI)/Netherlands Organisation for Scientific Research (NWO) Netherlands Consortium for Healthy Aging (NCHA), project nr. 050-060-810. We thank Pascal Arp, Mila Jhamai, Marijn Verkerk, Lizbeth Herrera and Marjolein Peters, MSc, and Carolina Medina-Gomez, MSc, for their help in creating the GWAS database, and Karol Estrada, PhD, Yurii Aulchenko, PhD, and Carolina Medina-Gomez, MSc, for the creation and analysis of imputed data. The Rotterdam Study is funded by Erasmus Medical Center and Erasmus University, Rotterdam, Netherlands Organization for the Health Research and Development (ZonMw), the Research Institute for Diseases in the Elderly (RIDE), the Ministry of

Education, Culture and Science, the Ministry for Health, Welfare and Sports, the European Commission (DG XII), and the Municipality of Rotterdam. The authors are grateful to the study participants, the staff from the Rotterdam Study and the participating general practitioners and pharmacists.

This study makes use of sequence reference data generated by the UK10K Consortium, derived from samples from the ALSPAC and TwinsUK datasets. A full list of the investigators who contributed to the generation of the data is available from [www.UK10K.org](http://www.UK10K.org). Funding for UK10K was provided by the Wellcome Trust under award WT091310. We thank Jie Huang at the Wellcome Trust's Sanger Institute, at Hinxton, U.K. for the creation of imputed data, with the support of Marijn Verkerk, Carolina Medina-Gomez, MSc, and Anis Abuseiris and their input for the analysis setup.

MS GWAS: We thank the IMSGC, the ANZgene consortium and the WTCCC for access to their data. This research has been conducted using the UK Biobank Resource.

McGill Coordinating Centre: We acknowledge our funding partners: Canadian Institutes of Health Research, Fonds du Recherche en Santé du Quebec, Canadian Foundation for Innovation, The Lady Davis Institute for Medical Research, RMGA: Network for Applied Genetic Medicine. CPEG: Canadian Pediatric Endocrinology Group

NEO: The authors of the NEO study thank all individuals who participated in the Netherlands Epidemiology in Obesity study, all participating general practitioners for inviting eligible participants and all research nurses for collection of the data. We thank the NEO study group, Pat van Beelen, Petra Noordijk and Ingeborg de Jonge for the coordination, lab and data management of the NEO study.

### ***Funding***

ALSPAC: T. Dudding, S. Haworth and N. Timpson work in a unit that receives funding from the University of Bristol and the UK Medical Research Council (Grant ref: MC\_UU\_12013/3). T. Dudding and S. Haworth receive support from Wellcome (Grant refs: 201268/Z/16/Z and 201237/Z/16/Z). This work was supported by CRUK [grant number C18281/A19169]

BMDCS: Supported by the National Institutes of Health [grant numbers HD58886, HD076321]; the Eunice Kennedy Shriver National Institute of Child Health and Human Development (NICHD) contracts (N01-HD-1-3228, -3329, -3330, -3331, -3332, -3333); and the CTSA program Grant 8 UL1 TR000077. Jonathan Mitchell was supported by K01 HL123612. The funders had no role in the design and conduct of the study; collection, management, analysis, and interpretation of the data; preparation, review, or approval of the manuscript; and decision to submit the manuscript for publication.

BPROOF: B-PROOF is supported and funded The Netherlands Organization for Health Research and Development (ZonMw, Grant 6130.0031), the Hague; unrestricted grant from NZO (Dutch Dairy Association), Zoetermeer; Orthica, Almere; NCHA (Netherlands Consortium Healthy Ageing) Leiden/Rotterdam; Ministry of Economic Affairs, Agriculture and Innovation (project KB-15-004-003), the Hague; Wageningen University, Wageningen; VUmc, Amsterdam; Erasmus Medical Center, Rotterdam; Unilever, Colworth, UK.

Cardiovascular Health Study: This CHS research was supported by NHLBI contracts HHSN268201200036C, HHSN268200800007C, N01HC55222, N01HC85079, N01HC85080, N01HC85081, N01HC85082, N01HC85083, N01HC85086; and NHLBI grants U01HL080295, R01HL087652, R01HL105756, R01HL103612, R01HL120393, and R01HL130114 with additional contribution from the National Institute of Neurological Disorders and Stroke (NINDS). Additional support was provided through R01AG023629 from the National Institute on Aging (NIA). A full list of principal CHS investigators and institutions can be found at [CHS-NHLBI.org](http://CHS-NHLBI.org). The provision of genotyping data was supported in part by the National Center for Advancing Translational

Sciences, CTSI grant UL1TR000124, and the National Institute of Diabetes and Digestive and Kidney Disease Diabetes Research Center (DRC) grant DK063491 to the Southern California Diabetes Endocrinology Research Center. Prof B. Psaty serves on the DSMB of a clinical trial funded by the manufacturer (Zoll LifeCor) and on the Steering Committee of the Yale Open Data Access Project funded by Johnson & Johnson.

Framingham Heart Study: The Framingham Heart Study of the National Heart, Lung and Blood Institute (NHLBI) of the US National Institutes of Health (NIH) and Boston University School of Medicine is supported by the NIH/NHLBI contract N01-HC-25195. The present study received support from the American Heart Association, the US Department of Agriculture, Agricultural Research Service (under Cooperative Agreement No 58-1950-7-707), and the National Institute of Aging (AG14759). Doug P. Kiel was supported by grants from the National Institute of Arthritis, Musculoskeletal, and Skin Diseases and the National Institute on Aging (R01 AR41398 and R01 AR061445). David Karasik was supported by a generous gift from the Samson Family. The analyses reflect intellectual input and resource development from the Framingham Heart Study investigators participating in the SNP Health Association Resource project. This work was partly supported by a contract with Affymetrix Inc for genotyping services (Contract No N02-HL-6-4278). A portion of this research used the Linux Cluster for Genetic Analysis, which is funded by the Robert Dawson Evans Endowment of the Department of Medicine at Boston University School of Medicine and Boston Medical Center.

GenerationR: This work is supported by the Netherlands Organization for Health Research and Development ZonMw VIDI 016.136.367. Vincent V.W. Jaddoe. received an additional grant from the Netherlands Organization for Health Research and Development (VIDI 016.136.361) and a Consolidator Grant from the European Research Council (ERC-2014-CoG-64916). Vincent V.W. Jaddoe has received funding from the European Union's Horizon 2020 research and innovation programme under grant agreement No 633595 (DynaHEALTH). The Generation R Study received funding from the European Union's Horizon 2020 research and innovation programme (733206, LIFECYCLE).

MrOS-USA (MrOS): The Osteoporotic Fractures in Men (MrOS) Study is supported by National Institutes of Health funding. The following institutes provide support: the National Institute on Aging (NIA), the National Institute of Arthritis and Musculoskeletal and Skin Diseases (NIAMS), the National Center for Advancing Translational Sciences (NCATS), and NIH Roadmap for Medical Research under the following grant numbers: U01 AG027810, U01 AG042124, U01 AG042139, U01 AG042140, U01 AG042143, U01 AG042145, U01 AG042168, U01 AR066160, and UL1 TR000128.

MrOS Sweden (MrOS Malmo, GBG) and GOOD: Financial support was received from the Swedish Research Council, the Swedish Foundation for Strategic Research, the ALF/LUA research grant in Gothenburg, the Lundberg Foundation, the Torsten and Ragnar Söderberg's Foundation, the Knut and Alice Wallenberg Foundation, the Novo Nordisk Foundation, and the European Commission grant HEALTH-F2-2008-201865-GEFOS.

RSI, RS-II, RS-III: This work is supported by the Netherlands Organization for Health Research and Development ZonMw VIDI 016.136.367

TUK: The TwinsUK study was funded by the Wellcome Trust; European Community's Seventh Framework Programme (FP7/2007-2013). The study also receives support from the National Institute for Health Research (NIHR) BioResource Clinical Research Facility and Biomedical Research Centre based at Guy's and St Thomas' NHS Foundation Trust and King's College London. TDS is holder of an ERC Advanced Principal Investigator award. SNP Genotyping was performed by The Wellcome Trust Sanger Institute and National Eye Institute via NIH/CIDR for TwinsUK. The study also received support from the Australian National Health and Medical Research Council (Project Grants 1010494 and 1048216).

MS GWAS: This project was supported by the UK MS Society (grant ref 07/861) and the National Institute for Health Research - Cambridge Biomedical Research Centre.

MESA: This research was supported by contracts HHSN268201500003I, N01-HC-95159, N01-HC-95160, N01-HC-95161, N01-HC-95162, N01-HC-95163, N01-HC-95164, N01-HC-95165, N01-HC-95166, N01-HC-95167, N01-HC-95168 and N01-HC-95169 from the National Heart, Lung, and Blood Institute, and by grants UL1-TR-000040, UL1-TR-001079, and UL1-TR-001420 from NCATS. The authors thank the other investigators, the staff, and the participants of the MESA study for their valuable contributions. A full list of participating MESA investigators and institutions can be found at <http://www.mesa-nhlbi.org>.

McGill Study Coordinating Centre: John Brent Richards and his team are supported by the Fonds de Recherche Santé Québec, Canadian Institutes of Health Research, the Lady Davis Institute, the Jewish General Hospital and the Canadian Foundation for Innovation. Despoina Manousaki is supported by the Canadian Pediatric Endocrinology Group.

NEO: The genotyping in the NEO study was supported by the Centre National de Génotypage (Paris, France), headed by Jean-Francois Deleuze. The NEO study is supported by the participating Departments, the Division and the Board of Directors of the Leiden University Medical Center, and by the Leiden University, Research Profile Area Vascular and Regenerative Medicine. Dennis Mook-Kanamori is supported by Dutch Science Organization (ZonMW-VENI Grant 916.14.023).

PIVUS and ULSAM: financial support for the genetic analyses was received from the Swedish Research Council.

### ***Other***

#### **Ethical Approval-Data Sharing**

ALSPAC: Ethical approval for the study was obtained from the ALSPAC Ethics and Law Committee and the Local Research Ethics Committees.

#### ***Author information***

Cardiovascular Health Study: A full list of principal CHS investigators and institutions can be found at [CHS-NHLBI.org](http://CHS-NHLBI.org).

BMDCS: The 'Bone Mineral Density in Childhood Study' is an NIH funded multicenter, longitudinal study of bone accrual in healthy children. All PIs are listed below: Heidi J. Kalkwarf, PhD, Division of Gastroenterology, Hepatology and Nutrition, Cincinnati Children's Hospital Medical Center, Cincinnati; Joan M. Lappe, PhD, Division of Endocrinology, Department of Medicine, Creighton University, Omaha; Vicente Gilsanz, MD, Department of Radiology, Children's Hospital Los Angeles, Los Angeles;; Sharon E. Oberfield, MD, Division of Pediatric Endocrinology, Diabetes, and Metabolism, Department of Pediatrics, Columbia University Medical Center, New York; John A. Shepherd, PhD, Department of Radiology, University of California San Francisco, San Francisco, Andrea Kelly, MD, Department of Pediatrics, Perelman School of Medicine, University of Pennsylvania, Philadelphia and Division of Endocrinology and Diabetes, The Children's Hospital of Philadelphia, Philadelphia; Babette S. Zemel, PhD, Department of Pediatrics, Perelman School of Medicine, University of Pennsylvania, Philadelphia and Division of Gastroenterology, Hepatology and Nutrition, The Children's Hospital of Philadelphia, Philadelphia. We appreciate the dedication of the study participants and their families, and the support of Dr. Karen Winer, Scientific Director of the Bone Mineral Density in Childhood Study.
